# Supplementary material for: An Update on Apathy in Alzheimer’s Disease
Source: MDPI journal article supplement (doi:10.3390/geriatrics8040075), 2023-07-14
Supplement: s1 [file s1]

## Supplementary

**Table S1:** Instruments and scales used to assess apathy

| Name of Scale/Instrument                                                            | Rating Scales/Instruments to assess Apathy<br>Components                                                                                                                                                                                                                                                                                                                                                                                                                                                                                                                                                   |
|-------------------------------------------------------------------------------------|------------------------------------------------------------------------------------------------------------------------------------------------------------------------------------------------------------------------------------------------------------------------------------------------------------------------------------------------------------------------------------------------------------------------------------------------------------------------------------------------------------------------------------------------------------------------------------------------------------|
| Neuro-Psychiatric Inventory-Apathy (NPI-Apathy) [28,30]                             | <p>Designed for use in patients with dementia (multiple aetiologies)</p> <p>Score is based on responses from an informed caregiver, preferably one living with the patient</p> <p>The person should have spent at least 4 h per day at least 4 days per week with the patient and who is knowledgeable about the patient's daytime and night-time behaviours</p>                                                                                                                                                                                                                                           |
|                                                                                     | <p>The NPI rates frequency, severity and caregiver distress at symptoms</p>                                                                                                                                                                                                                                                                                                                                                                                                                                                                                                                                |
|                                                                                     | <p>Frequency is rated as:</p> <ol style="list-style-type: none"> <li>1. Rarely—less than once per week</li> <li>2. Sometimes—about once per week</li> <li>3. Often—several times per week but less than every day</li> <li>4. Very often—once or more per day</li> </ol>                                                                                                                                                                                                                                                                                                                                   |
|                                                                                     | <p>Severity is rated as:</p> <ol style="list-style-type: none"> <li>1. Mild—produces little distress in the patient</li> <li>2. Moderate—more disturbing to the patient but can be redirected by the caregiver</li> <li>3. Severe—very disturbing to the patient and difficult to redirect</li> </ol>                                                                                                                                                                                                                                                                                                      |
| Apathy Evaluation Scale–self (AES-S), clinicians (AES-C), informant (AES-I) [31,32] | <p>Distress is scored as:</p> <ol style="list-style-type: none"> <li>0. Not at all</li> <li>1. Minimally (almost no change in work routine)</li> <li>2. Mildly (some change in work routine but little time rebudgeting required)</li> <li>3. Moderately (disrupts work routine, requires time rebudgeting)</li> <li>4. Severely (disruptive, upsetting to staff and other residents, major time infringement)</li> <li>5. Very Severely or Extremely (very disruptive, major source of distress for staff and other residents, requires time usually devoted to other residents or activities)</li> </ol> |
|                                                                                     | <p>NPI-Apathy includes 3 screening questions and 8 sub-questions including items such as:</p> <p>Has the patient lost interest in the world around him/her?</p> <p>Has he/she lost interest in doing things or does he/she lack motivation for starting new activities?</p> <p>Is the patient less enthusiastic about his/her usual interests?</p> <p>Does the patient show any other signs that he/she doesn't care about doing new things?</p>                                                                                                                                                           |
|                                                                                     | <p>Designed for use in persons with dementia (multiple aetiologies)</p> <p>The AES-S, AES-C and AES-I all assess the same 18 items, with ratings made from 1 (not at all characteristic) to 4 (very characteristic) on 18 items, for example:</p>                                                                                                                                                                                                                                                                                                                                                          |

|                                                  |                                                                                                                                                                                                                                                                                                                                                                                                                                                                                                                                                                                                                                                                                                                                                                                                                                                  |
|--------------------------------------------------|--------------------------------------------------------------------------------------------------------------------------------------------------------------------------------------------------------------------------------------------------------------------------------------------------------------------------------------------------------------------------------------------------------------------------------------------------------------------------------------------------------------------------------------------------------------------------------------------------------------------------------------------------------------------------------------------------------------------------------------------------------------------------------------------------------------------------------------------------|
|                                                  | <p>S/he is interested in having new experiences<br/> S/he is interested in learning new things<br/> When something good happens, s/he gets excited</p> <p>AES-C: Performed as part of a structured interview between clinician and patient, based on both verbal and non-verbal information with ratings based on the past 4 weeks<br/> AES-I: Reported by informant<br/> AES-S: Self-reported by patient</p> <p>Scores for the AES range from 18 to 72. In the original validation study (2), the mean (standard deviation) score for 30 healthy older adults were: AES-C: 26 (+/-6); AES-I: 26 (+/-7.5); AES-S: 28 (+/-6)</p>                                                                                                                                                                                                                  |
| Apathy Scale [37]                                | <p>Includes a set of 14 questions, initially validated in patients with Parkinson's Disease:</p> <p>Questions include examples such as<br/> Are you concerned about your condition?<br/> Do you put much effort into things?<br/> Are you always looking for something to do?</p> <p>Scoring<br/> For questions 1–8, not at all = 3 points; slightly = 2; some = 1; a lot = 0<br/> For questions 9–14, not at all = 0; slightly = 1; some = 2; a lot = 3</p>                                                                                                                                                                                                                                                                                                                                                                                     |
| Apathy Inventory [38]                            | <p>Designed for use in patients with probable AD, Parkinson's disease and MCI<br/> Caregiver (AI-C)- and patient (AI-P)-version both assess:<br/> Emotional blunting<br/> Lack of initiative<br/> Lack of interest</p> <p>AI-C: If the response is positive, the frequency and gravity of the item are explored<br/> How frequently do these problems arise?<br/> How severe are these problems; to what extent do they disturb or handicap the patient?'<br/> For each of the three questions, the maximum score (Frequency 1–4, Severity 1–3) is 12, giving a maximum total score of 36<br/> AI-P: The score for each dimension is obtained by using a Likert-style scale (1–12): if the symptom is present, the subject is asked to estimate its intensity (from mild at the left-hand end of the scale, to severe at the right-hand end)</p> |
| Dementia Apathy Interview and Rating (DAIR) [39] | <p>Designed for use in patients with possible and probable AD<br/> Sixteen-item scale that consists of a structured interview with a caregiver – specifically designed for persons with dementia (all types)<br/> The caregiver must have seen the individual with dementia at least two times each week for the previous month<br/> Include items in the scale minimally related to cognitive ability (e.g., Are there things s/he is enthusiastic about? Does s/he show interest in news about friends and relatives?)<br/> Respondents must record for each behaviour whether it is a change from baseline</p>                                                                                                                                                                                                                                |
| Dimensional Apathy Scale (DAS) [40,41]           | <p>Twenty-four-item multidimensional apathy measure undertaken by carers<br/> Composed of three subscales: executive, emotional, and initiation</p>                                                                                                                                                                                                                                                                                                                                                                                                                                                                                                                                                                                                                                                                                              |

|                                                            |                                                                                                                                                                                                                                                                                                                                                                                                                                                                                                                                                                                                                                                                                                                                                                                                                                                                                                                   |
|------------------------------------------------------------|-------------------------------------------------------------------------------------------------------------------------------------------------------------------------------------------------------------------------------------------------------------------------------------------------------------------------------------------------------------------------------------------------------------------------------------------------------------------------------------------------------------------------------------------------------------------------------------------------------------------------------------------------------------------------------------------------------------------------------------------------------------------------------------------------------------------------------------------------------------------------------------------------------------------|
|                                                            | <p>Examples of</p> <p>Executive subscale "S/he finds it difficult to keep his/her mind on things"</p> <p>Emotional subscale "S/he is indifferent to what is going on around him/her"</p> <p>Initiation subscale "S/he acts on things s/he has thought about during the day"</p> <p>Created specifically to better profile apathy subtypes in people with neurodegenerative and neurological disease</p> <p>Items are scored on a 4-point Likert scale</p> <p>The items are summed for each subscale, with the total subscale score ranging from 0 (least apathetic) to 24 (most apathetic), with a DAS total score ranging from 0 to 72</p>                                                                                                                                                                                                                                                                       |
| Apathy Motivation Index (AMI) [42]                         | <p>Validated in healthy community dwelling population</p> <p>Self-administered 18-item scale</p> <p>Participants self-rate each item on a five-point Likert scale by deciding how true that statement was based on the past two weeks of their life</p> <p>The scale ranges from 0–4 (with 0 = 'completely untrue', 4 = 'completely true')</p> <p>Each item is reverse-scored so that a higher rating indicates more apathy</p> <p>Composed of six items for each of three subscales</p> <p>Behavioural activation (goal-directed behaviour initiation, e.g., "I get things done when they need to be done, without requiring reminders from others")</p> <p>Social motivation (interest and engagement in social interactions, e.g., "I start conversations without being prompted")</p> <p>Emotional sensitivity (feeling positive and negative emotions, e.g., "I feel sad or upset when I hear bad news")</p> |
| Lille Apathy Rating Scale (LARS) [43,44]                   | <p>Scale was initially validated to diagnose apathy in persons with probable Parkinson's disease</p> <p>Comprises 33 queries belonging to 9 domains with overall score ranges from -36 to +36 and each domain corresponding to a clinical manifestation of apathy including the following:</p> <p>Everyday productivity</p> <p>Interests</p> <p>Taking initiative</p> <p>Novelty seeking</p> <p>Motivation- voluntary actions</p> <p>Emotional responses</p> <p>Concern</p> <p>Social Life</p> <p>Self- awareness</p>                                                                                                                                                                                                                                                                                                                                                                                             |
| APADEM-NH (APathy in DEMentia, Nursing Home) scale [45,46] | <p>Validated in nursing home residents with dementia (unspecified type)</p> <p>Scale undertaken by caregiver known to patient</p> <p>26 items assessed:</p> <p>Deficits of Thinking and Self-Generated behaviours: 13 items</p> <p>Emotional Blunting: 7 items</p> <p>Cognitive Inertia: 6 items</p> <p>Each item is scored from 0 to 3</p> <p>0: No Apathy (spontaneous emotion or action)</p> <p>1: Mild Apathy (action or emotion needs some kind of stimulation)</p> <p>2: Moderate Apathy (action or emotion obtained only with intense stimulation)</p> <p>3: Severe Apathy (not responding to any intervention)</p>                                                                                                                                                                                                                                                                                        |

|                                                     |                                                                                                                                                                                                                                                                                                                                                                                                                                                                                                                                                                                                                                                                                                                                                                                                          |
|-----------------------------------------------------|----------------------------------------------------------------------------------------------------------------------------------------------------------------------------------------------------------------------------------------------------------------------------------------------------------------------------------------------------------------------------------------------------------------------------------------------------------------------------------------------------------------------------------------------------------------------------------------------------------------------------------------------------------------------------------------------------------------------------------------------------------------------------------------------------------|
| Person- Environment Apathy Rating (PEAR) scale [29] | <p>Designed for use in persons with dementia (unspecified type)</p> <p>Consists of two subscales, PEAR-Environment and PEAR-Apathy</p> <p>Each subscale has six items, and each item is rated on a 1–4 scale; higher ratings indicate a better environment and greater apathy, respectively</p> <p>The total score ranges from 6 to 24 for each subscale</p> <p>PEAR-Environment subscale assesses:<br/>stimulation clarity, stimulation strength, stimulation specificity, interaction involvement, physical accessibility, and environmental feedback</p> <p>PEAR-Apathy subscale evaluates:<br/>facial expression, eye contact, physical engagement, purposeful activity, verbal tone, and verbal expression that reflect the symptoms of apathy in cognitive, behavioural, and affective domains</p> |
|-----------------------------------------------------|----------------------------------------------------------------------------------------------------------------------------------------------------------------------------------------------------------------------------------------------------------------------------------------------------------------------------------------------------------------------------------------------------------------------------------------------------------------------------------------------------------------------------------------------------------------------------------------------------------------------------------------------------------------------------------------------------------------------------------------------------------------------------------------------------------|
